# Supplementary material for: The next step: intelligent digital assistance for clinical operating rooms
Source: publisher site journal article supplement (doi:10.1515/iss-2017-0034), 2017-08-25
Supplement: Supplementary file 1 [file iss-2017-0034_suppl.pdf]

## Reviewer Assessment

Juliana Miehle\*, Daniel Ostler, Nadine Gerstenlauer and Wolfgang Minker

# The next step: intelligent digital assistance for clinical operating rooms

<https://doi.org/10.1515/iss-2017-0034>

Received July 14, 2017; accepted August 3, 2017

**\*Corresponding author: Juliana Miehle**, Institute of Communications Engineering, Ulm University, Ulm, Germany,  
E-mail: juliana.miehle@uni-ulm.de

## Reviewers' Comments to Original Submission

### Reviewer 1: anonymous

Jul 14, 2017

|                                                                   |                 |
|-------------------------------------------------------------------|-----------------|
| <b>Reviewer Recommendation Term:</b>                              | Accept          |
| <b>Overall Reviewer Manuscript Rating:</b>                        | 100             |
| <b>Custom Review Questions</b>                                    | <b>Response</b> |
| Is the subject area appropriate for you?                          | 4               |
| Does the title clearly reflect the paper's content?               | 5 - High/Yes    |
| Does the abstract clearly reflect the paper's content?            | 5 - High/Yes    |
| Do the keywords clearly reflect the paper's content?              | 4               |
| Does the introduction present the problem clearly?                | 4               |
| Are the results/conclusions justified?                            | 4               |
| How comprehensive and up-to-date is the subject matter presented? | 5 - High/Yes    |
| How adequate is the data presentation?                            | N/A             |
| Are units and terminology used correctly?                         | N/A             |
| Is the number of cases adequate?                                  | N/A             |
| Are the experimental methods/clinical studies adequate?           | N/A             |
| Is the length appropriate in relation to the content?             | 5 - High/Yes    |
| Does the reader get new insights from the article?                | 5 - High/Yes    |
| Please rate the practical significance.                           | 4               |
| Please rate the accuracy of methods.                              | N/A             |
| Please rate the statistical evaluation and quality control.       | N/A             |
| Please rate the appropriateness of the figures and tables.        | N/A             |
| Please rate the appropriateness of the references.                | 5 - High/Yes    |
| Please evaluate the writing style and use of language.            | 4               |
| Please judge the overall scientific quality of the manuscript.    | 4               |
| Are you willing to review the revision of this manuscript?        | Yes             |

**Comments to Authors:**

Excellent paper which shows what needs to be the direction towards real digitalisation of the OR! Technically, it is probably much “easier” than overcoming regulatory and/or political obstacles.

Two recommendations which do not require a second peer-review:

- Key words: add “Operating Room of the Future (ORF)”.

**Reviewer 2: anonymous**

Aug 02, 2017

**Reviewer Recommendation Term:**

Accept

**Overall Reviewer Manuscript Rating:**

90

**Custom Review Questions****Response**

Is the subject area appropriate for you?

5 - High/Yes

Does the title clearly reflect the paper's content?

5 - High/Yes

Does the abstract clearly reflect the paper's content?

5 - High/Yes

Do the keywords clearly reflect the paper's content?

4

Does the introduction present the problem clearly?

5 - High/Yes

Are the results/conclusions justified?

4

How comprehensive and up-to-date is the subject matter presented?

5 - High/Yes

How adequate is the data presentation?

N/A

Are units and terminology used correctly?

N/A

Is the number of cases adequate?

N/A

Are the experimental methods/clinical studies adequate?

N/A

Is the length appropriate in relation to the content?

4

Does the reader get new insights from the article?

5 - High/Yes

Please rate the practical significance.

4

Please rate the accuracy of methods.

N/A

Please rate the statistical evaluation and quality control.

N/A

Please rate the appropriateness of the figures and tables.

N/A

Please rate the appropriateness of the references.

4

Please evaluate the writing style and use of language.

5 - High/Yes

Please judge the overall scientific quality of the manuscript.

4

Are you willing to review the revision of this manuscript?

Yes

**Comments to Authors:**

The author presents in this excellent paper a very interesting view in surgeons future regarding the implementation of next generation digital and interactive devices in the surgical environment. The current speed of intelligent digital evolution comprises the opportunity of modulating assisting systems to improve surgeons performance and reduce avoidable incidents - not only in the OR. It will be fascinating to observe how fast this general development will be transferred into medical respectively surgical domains.
